# Supplementary material for: Oncolytic herpes virus G47Δ injected into tongue cancer swiftly traffics in lymphatics and suppresses metastasis
Source: PubMed Central journal article supplement — Mol Ther Oncolytics. 2021 Jun 24;22:388–98. doi: 10.1016/j.omto.2021.06.008 (PMC8430046; doi:10.1016/j.omto.2021.06.008), 2021-06-24
Supplement: mmc1.pdf [file mmc1.pdf]

**OMTO, Volume 22**

**Supplemental information**

**Oncolytic herpes virus G47 $\Delta$  injected  
into tongue cancer swiftly traffics  
in lymphatics and suppresses metastasis**

**Toshihiro Uchihashi, Hirokazu Nakahara, Hiroshi Fukuhara, Miwako Iwai, Hirotaka Ito, Akinari Sugauchi, Minoru Tanaka, Mikihiro Kogo, and Tomoki Todo**

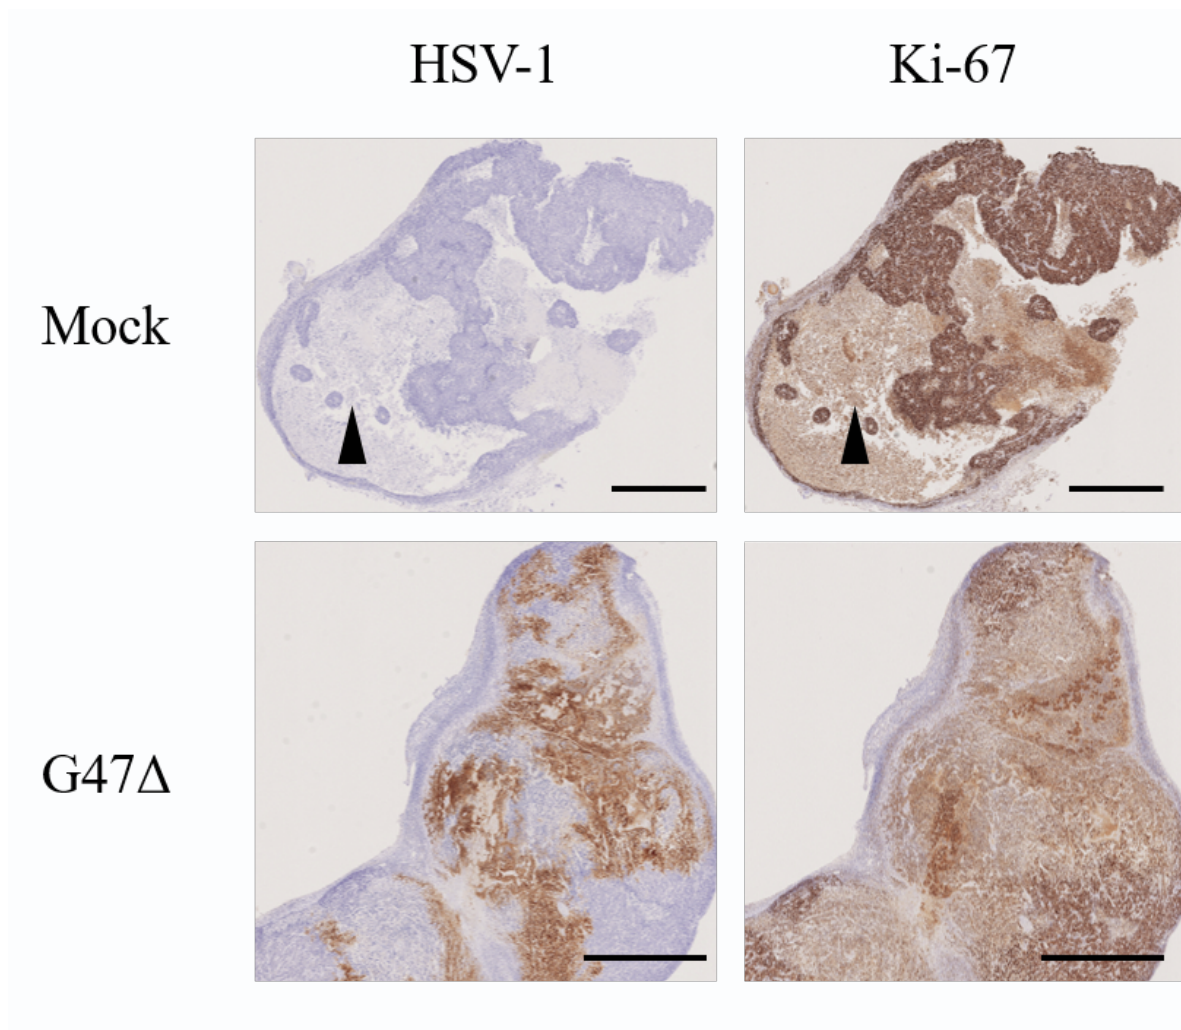

### Supplementary Figure 1.

Representative images of subcutaneous SAS tumors immunostained for HSV-1 or Ki-67.

Established subcutaneous SAS tumors were inoculated with G47Δ ( $1 \times 10^6$  pfu) or mock on

days 0 and 3. On day 15, tumors were extracted and used for HSV-1 or Ki-67

immunohistochemistry. In mock-treated tumors, viable tumor cells show strong

immunostaining for Ki-67, except for the area with necrosis (black arrowhead). By contrast,

in G47Δ- treated tumors, the rate of Ki-67 positivity of tumor cells drastically decreased in

the areas with high HSV-1 positivity. Scale Bar, 1 mm.

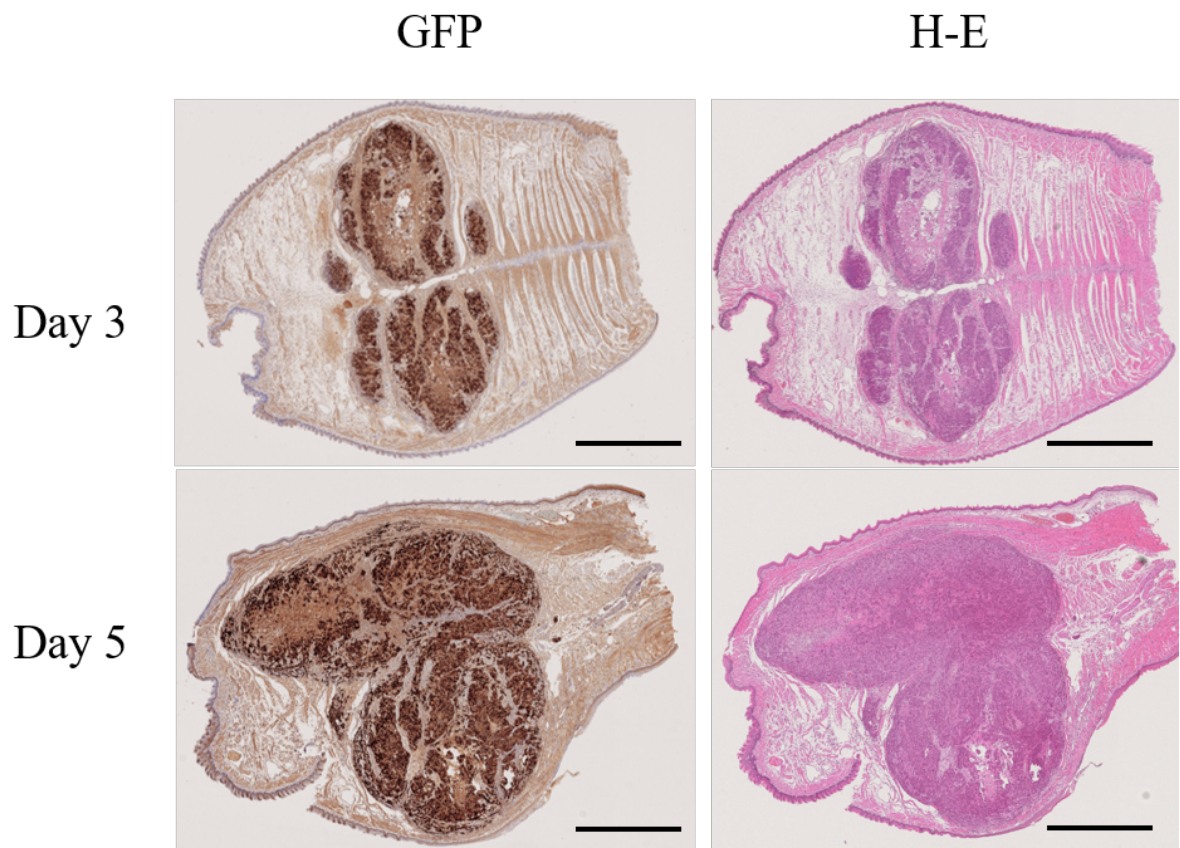

**Supplementary Figure 2.**

Representative images of immunostaining for GFP and H&E staining of SAS-GFP tumors in the orthotopic tongue cancer model. Three days or 5 days after implanting SAS-GFP cells ( $1 \times 10^6$ ) in the tongue of athymic mice, the tongues were excised for histological analysis.

The tumor is well established at day 3 and grows rapidly to occupy a large portion of the tongue by day 5. Scale Bar, 1 mm.

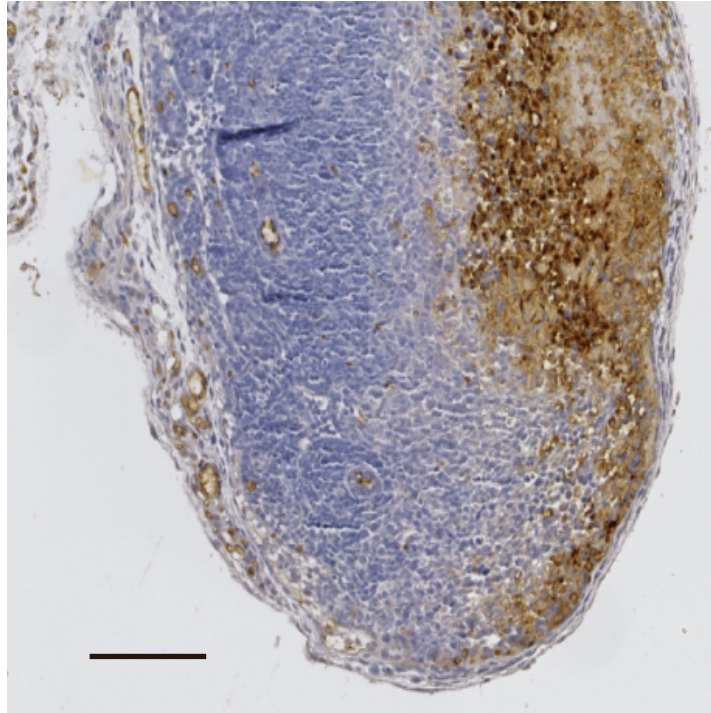

**Supplementary Figure 3.**

A representative image of HSV-1 immunostaining of a cervical lymph node in the HSC-3 tongue cancer model. HSC-3 cells ( $1 \times 10^6$ ) were implanted in the tongues of athymic mice. After 7 days, G47 $\Delta$  was intratumorally inoculated at a dose of  $1 \times 10^6$  pfu. The cervical lymph nodes were resected 3 days after virus inoculation. HSV-1 immunostaining revealed that G47 $\Delta$  infection was evident in the metastatic lymph nodes. Scale Bar, 100  $\mu$ m.

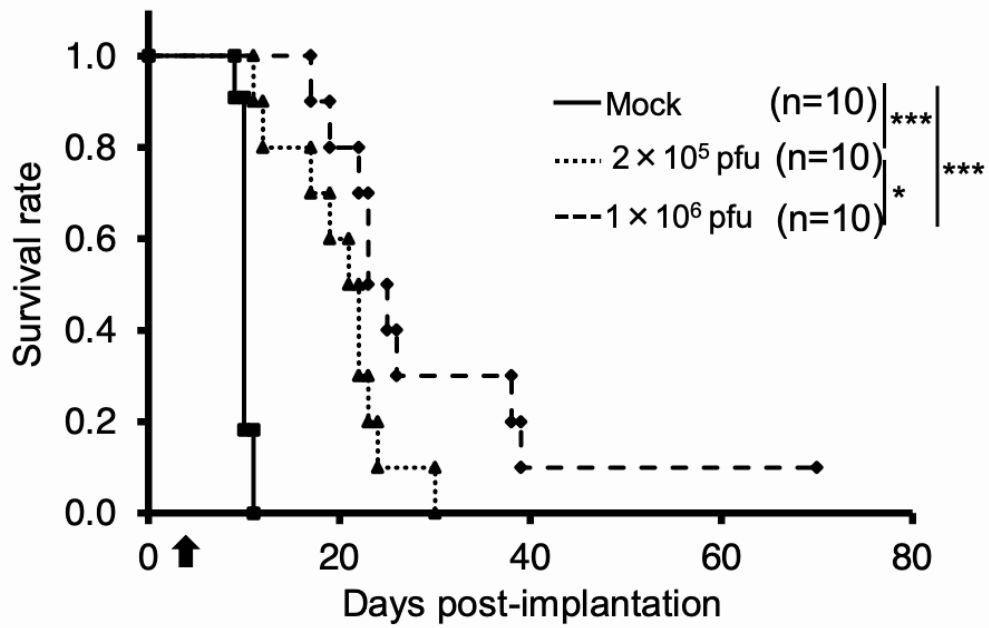

**Supplementary Figure 4.**

*In vivo* evaluation of intratumoral G47 $\Delta$  treatment in the SCCVII orthotopic tongue cancer model. SCCVII ( $2 \times 10^5$ ) cells were implanted in the tongues of C3H/He mice. After 3 days, G47 $\Delta$  was intratumorally inoculated at a dose of  $2 \times 10^5$  pfu or  $1 \times 10^6$  pfu.

Intratumoral G47 $\Delta$  treatment significantly prolonged the survival in a dose dependent manner.

Arrow indicates the timing of G47 $\Delta$  injection. \*,  $P < 0.05$ ; \*\*\*,  $P < 0.001$  (Log-rank test).

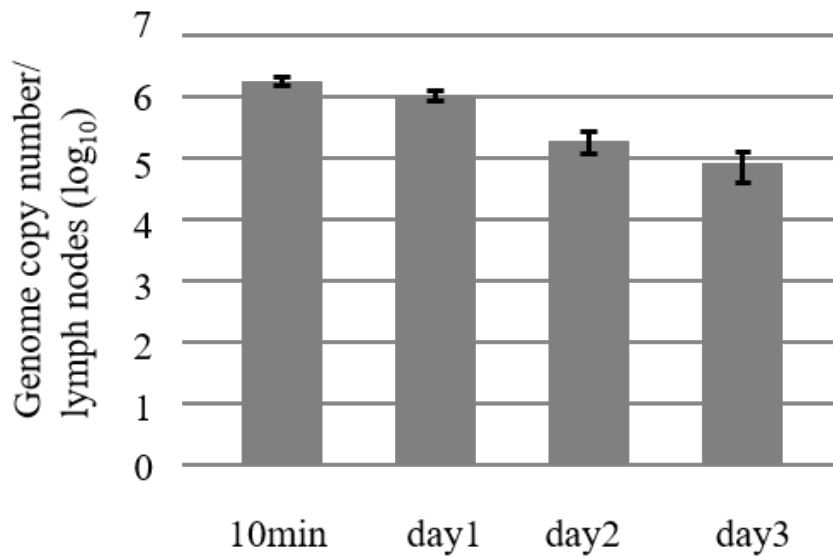

**Supplementary Figure 5.**

Viral DNA copy numbers in the cervical lymph nodes after G47 $\Delta$  injections to the primary tongue tumors in immunocompetent mice. KLN205-MUC1 cells ( $2 \times 10^5$ ) were implanted in the tongues of DBA/2 mice. After 7 days, G47 $\Delta$  was intratumorally inoculated at a dose of  $1 \times 10^6$  pfu. The cervical lymph nodes were removed 10 min, 1, 2, or 3 days after virus inoculation, and G47 $\Delta$  DNA copy numbers were quantified by quantitative real-time PCR. The copy numbers of G47 $\Delta$  DNA in the lymph nodes gradually decreased with time. N = 4 at each time point. Bars,  $\pm$ SEM.
